# Supplementary material
Source: Springer Nature journal article supplement (https://www.springermedizin.de/resource/supplementary/12955_2009_677_MOESM2_ESM.pdf/9561080)

## Estimation

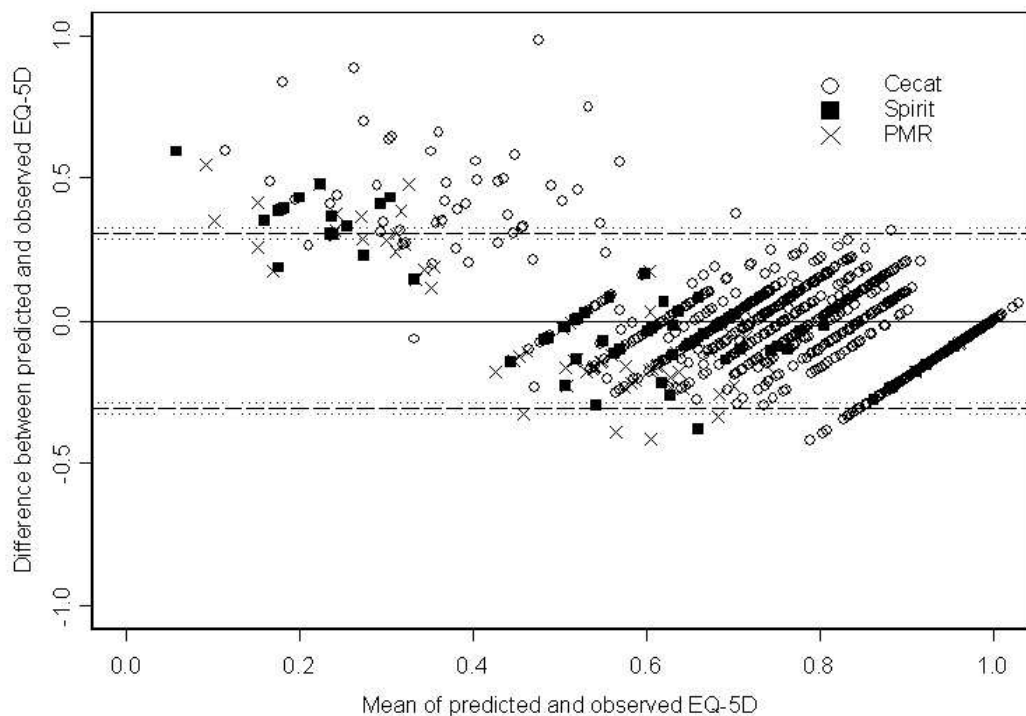

## Validation

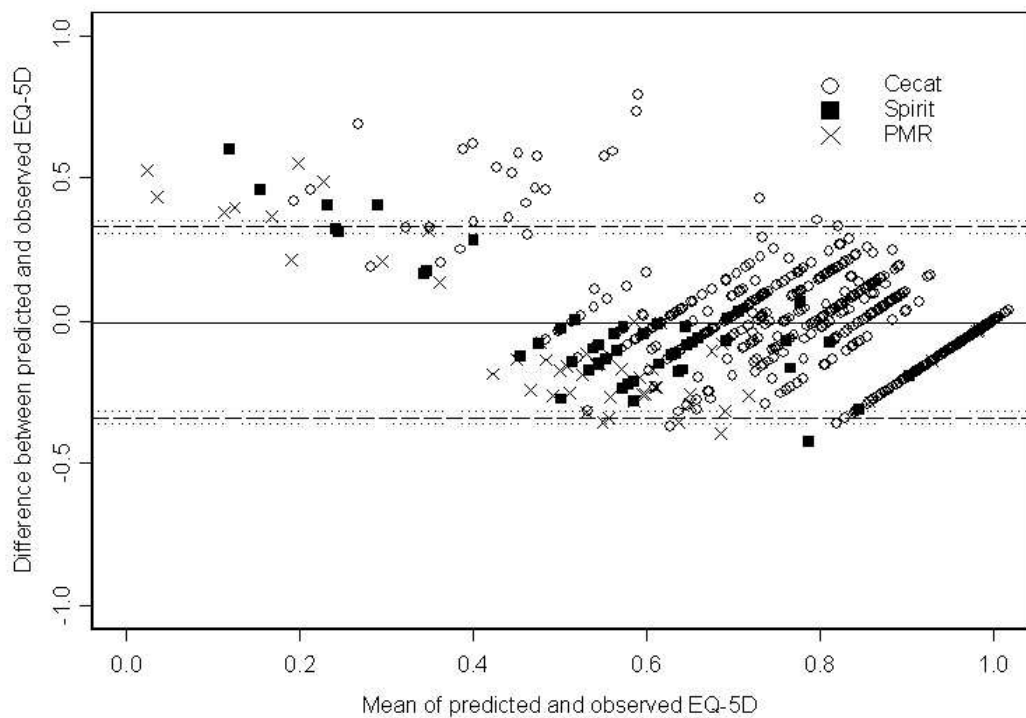

Supplement: MOESM2 [file 9561080]
